# Supplementary material
Source: Elsevier journal article supplement (https://www.sciencedirect.com/science/article/pii/S0213911117303163)
Supplement: mmc1 [file S0213911117303163:mmc1.docx]

**Anexo**

Se utilizó el conector AND.

*Religión*

Clergy[Mesh] OR Clergy[tiab] OR Religious Personnel[Mesh] OR Religious Personnel[tiab] OR Church of Jesus Christ of Latter-day Saints[Mesh] OR Church of Jesus Christ of Latter-day Saints[tiab] OR Protestantism[Mesh] OR Prostestantism[tiab] OR Parish Nursing[Mesh] OR Parish Nursing[tiab] OR Catholicism[Mesh] OR Catholicism[tiab] OR Eastern Orthodoxy[Mesh] OR Eastern Orthodoxy[tiab] OR Christian Science[Mesh] OR Christian Science[tiab] OR Faith-based[tiab] OR Faith-Based Intervention[tiab] OR Church-Based intervention[tiab] OR Church-Based[tiab] OR Religion[Mesh] OR Religion[tiab] OR Religion and Science[Mesh] OR Religion and Science[tiab] OR Religion and Psychology[Mesh] OR Religion and Psychology[tiab] OR Religion and Medicine[Mesh] OR Religion and Medicine[tiab] OR Faith-Placed[tiab] OR Faith-Placed intervention[tiab] OR Hospitals, Religious[Mesh] OR Hospital, Religious[tiab] OR Nuns[Mesh] OR Nuns[tiab] OR Monks[Mesh] OR Monks[tiab] OR Jehovah's Witnesses[Mesh] OR Jehovah's Witnesses[tiab] OR Chaplaincy Service, Hospital[Mesh] OR Chaplaincy Service, Hospital[tiab] OR Missionaries[Mesh] OR Missionaries[tiab] OR Religious Services[tiab] OR Prayer[tiab] OR Faith Healing[Mesh] OR Faith Healing[tiab] OR Religious Coping[tiab] OR Religious/Spiritual Identity[tiab] OR Religious Institutions[tiab] OR priest[tiab]

*Tipos de intervención*

Early Intervention (Education)[Mesh] OR Early Medical Intervention[Mesh] OR Controlled Before-After Studies[Mesh] OR Non-Randomized Controlled Trials as Topic[Mesh] OR Controlled Clinical Trials as Topic[Mesh] OR Controlled Clinical Trials as Topic[tiab] OR Controlled Clinical Trial [Publication Type][Mesh] OR Controlled Clinical Trial [Publication Type][tiab] OR Clinical trial[all] OR Clinical trial[tiab] OR Intervention[tiab]

*Países de América Latina*

(((((Argentina[Mesh] OR Argentin*[ad] OR Argentin*[tiab] OR Argentina[pl] OR Bolivia[Mesh] OR Bolivia*[ad] OR Bolivia*[tiab] OR Bolivia[pl] OR Brazil[Mesh] OR Brazil*[ad] OR Brazil*[tiab] OR Brasil*[ad] OR Brazil[pl] OR Colombia[Mesh] OR Colombia*[ad] OR Colombia*[tiab] OR Colombia[pl] OR Chile[Mesh] OR Chile*[ad] OR Chile*[tiab] OR Chile[pl] OR Ecuador[Mesh] OR Ecuador*[ad] OR Ecuador*[tiab] OR Ecuador[pl] OR Paraguay[Mesh] OR Paraguay*[ad] OR Paraguay*[tiab] OR Paraguay[pl] OR Peru[Mesh] OR Peru*[ad] OR Peru*[tiab] OR Peru[pl] OR Uruguay[Mesh] OR Uruguay*[ad] OR Uruguay*[tiab] OR Uruguay[pl] OR Venezuela[Mesh] OR Venezuel*[ad] OR Venezuel*[tiab] OR Venezuela[pl] OR Costa Rica[Mesh] OR Costa Ric*[ad] OR Costa Ric*[tiab] OR Costarric*[ad] OR Costarric*[tiab] OR Costaric*[tiab] OR Costa Rica[pl] OR El Salvador[Mesh] OR Salvador*[ad] OR Salvador*[tiab] OR El Salvador[pl] OR Guatemala[Mesh] OR Guatemal*[ad] OR Guatemal*[tiab] OR Guatemala[pl] OR Honduras[Mesh] OR Hondur*[ad] OR Hondur*[tiab] OR Honduras[pl] OR Nicaragua[Mesh] OR Nicaragu*[ad] OR Nicaragua[pl] OR Nicaragu*[tiab] OR Panama[Mesh] OR Panam*[ad] OR Panam*[tiab] OR Panama[pl] OR Mexico[Mesh] OR Mexic*[ad] OR Mexic*[tiab] OR Mejic*[ad] OR Mexico[pl] OR Cuba[Mesh] OR Cuba*[ad] OR Cuba*[tiab] OR Cuba[pl] OR Dominican Republic[Mesh] OR Dominic*[ad] OR Dominic*[tiab] OR Dominican Republic[pl] OR Haiti[Mesh] OR Haiti*[ad] OR Haiti*[tiab] OR Haiti[pl])))))
